# Supplementary material
Source: PubMed Central journal article supplement (PMC3190308)
Supplement: NIHMS255689-supplement-supplement_1.pdf [file NIHMS255689-supplement-supplement_1.pdf]

## Supplementary Information; Olanich et al.

### Supplementary Figure legends

**Supplementary Figure 1** Total numbers of cellular NPM mRNAs remain unchanged in response to rapamycin treatment, FBP1 overexpression, or FBP1 depletion. NPM mRNA was measured by qRT-PCR from total RNA extracted from MEFs and was normalized to histone 3.3 mRNA. Fold change was calculated by the  $\Delta\Delta C_T$  method (Livak and Schmittgen 2001). Values are mean  $\pm$  s.d. of triplicate samples per condition from three independent experiments. (a) Rapamycin treatment does not affect total cellular levels of NPM transcripts. (b) NPM mRNA levels are unchanged upon overexpression of FBP1. (c) Depletion of FBP1 fails to affect total numbers of NPM mRNAs.

**Supplementary Figure 2** RACE results and chimeric reporters. (a) Sequences of the 5' and 3' UTRs of the NPM mRNA. (b) Schematic representation of UTR-firefly *luciferase* reporter constructs.

**Supplementary Figure 3** Database search results from mass spectrometry analyses. Shown are the complete peptide summaries for each of the proteins identified by mass spectrometry.

### SI References

Livak KJ, Schmittgen TD (2001). Analysis of relative gene expression data using real-time quantitative PCR and the  $2^{-(\Delta\Delta C_T)}$  Method. *Methods* **25**: 402-408.

# Olanich et al\_Figure S1

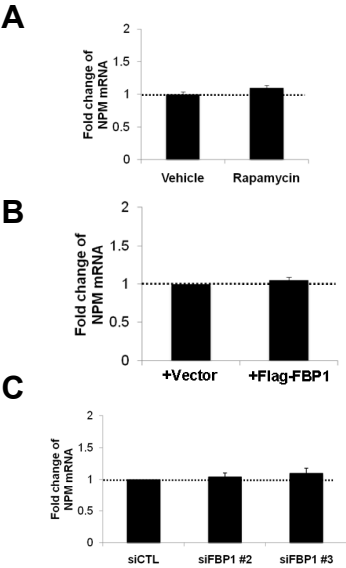



# Olanich et al\_Figure S3

Mass Spectrometry and Database Search Results  
 Database: nr\_20070218 20070218 (4641100 sequences; 1602026208 residues)  
 Database searching: MASCOT DISTILLER; MASCOT version 2.2.04.

| Band    | (Accession) Primary Protein Name                                                                                                                                                                                                                                                                                                                                                                                                                                                                                                                                                                                                                                         | Protein Molecular Weight | Protein Score | Unique Peptides | Sequence              | Mascot Ion Score | m/z (observed) | Mass (observed) | Mass (theoretical) | Mass Error (ppm) | Modifications   |
|---------|--------------------------------------------------------------------------------------------------------------------------------------------------------------------------------------------------------------------------------------------------------------------------------------------------------------------------------------------------------------------------------------------------------------------------------------------------------------------------------------------------------------------------------------------------------------------------------------------------------------------------------------------------------------------------|--------------------------|---------------|-----------------|-----------------------|------------------|----------------|-----------------|--------------------|------------------|-----------------|
| 2       | 1: gi 19424312 KH-type splicing regulatory protein [Mus musculus]                                                                                                                                                                                                                                                                                                                                                                                                                                                                                                                                                                                                        | 74465.6                  | 403           | 13              | VQISPDSSGLPER         | 106              | 677.85151      | 1353.688468     | 1353.688797        | 0.2              | Oxidation (M)   |
|         |                                                                                                                                                                                                                                                                                                                                                                                                                                                                                                                                                                                                                                                                          |                          |               |                 | VPDGMVGLIIGR          | 93               | 621.84839      | 1241.682228     | 1241.68013         | 1.6              |                 |
|         |                                                                                                                                                                                                                                                                                                                                                                                                                                                                                                                                                                                                                                                                          |                          |               |                 | AINQQTGAFVEISR        | 92               | 767.40545      | 1532.796348     | 1532.794647        | 1.1              |                 |
|         |                                                                                                                                                                                                                                                                                                                                                                                                                                                                                                                                                                                                                                                                          |                          |               |                 | QLEDGDQDPSK           | 78               | 616.27489      | 1230.535228     | 1230.536407        | 0.9              |                 |
|         |                                                                                                                                                                                                                                                                                                                                                                                                                                                                                                                                                                                                                                                                          |                          |               |                 | IINDLLQSLR            | 72               | 592.85438      | 1183.694208     | 1183.692444        | 1.4              |                 |
|         |                                                                                                                                                                                                                                                                                                                                                                                                                                                                                                                                                                                                                                                                          |                          |               |                 | IGGDAATTNNNTPDFGFGGQK | 71               | 1091.0121      | 2180.009648     | 2180.013336        | 1.6              |                 |
|         |                                                                                                                                                                                                                                                                                                                                                                                                                                                                                                                                                                                                                                                                          |                          |               |                 | MILIQDGSQNTNVKPLR     | 69               | 1029.5323      | 2057.050048     | 2057.057495        | 3.6              |                 |
|         |                                                                                                                                                                                                                                                                                                                                                                                                                                                                                                                                                                                                                                                                          |                          |               |                 | IQNDAGVVR             | 69               | 436.73279      | 871.451028      | 871.451141         | 0.1              |                 |
|         |                                                                                                                                                                                                                                                                                                                                                                                                                                                                                                                                                                                                                                                                          |                          |               |                 | VGGGIDVPVPR           | 69               | 533.30605      | 1064.597548     | 1064.597778        | 0.2              |                 |
|         |                                                                                                                                                                                                                                                                                                                                                                                                                                                                                                                                                                                                                                                                          |                          |               |                 | MMLDDIVSR             | 66               | 556.25963      | 1110.504708     | 1110.504913        | 0.1              |                 |
|         |                                                                                                                                                                                                                                                                                                                                                                                                                                                                                                                                                                                                                                                                          |                          |               |                 | TSMTTEEYR             | 65               | 516.7182       | 1031.421848     | 1031.422958        | 1                |                 |
|         |                                                                                                                                                                                                                                                                                                                                                                                                                                                                                                                                                                                                                                                                          |                          |               |                 | QLPPNGDPNFK           | 62               | 613.81152      | 1225.608488     | 1225.6091          | 0.4              |                 |
|         |                                                                                                                                                                                                                                                                                                                                                                                                                                                                                                                                                                                                                                                                          |                          |               |                 | AWEEYYK               | 42               | 494.72421      | 987.433868      | 987.433762         | 0.1              |                 |
|         |                                                                                                                                                                                                                                                                                                                                                                                                                                                                                                                                                                                                                                                                          |                          |               |                 | 34                    | 494.72421        | 987.433868     | 987.433762      | 987.433762         | 0.1              |                 |
| 3       | 1: gi 37078458 Far upstream element-binding protein 1 (FUSE-binding protein 1) (FBP)<br>2: gi 74206095 unnamed protein product [Mus musculus]<br>3: gi 84662730 far upstream element (FUSE) binding protein 1 [Mus musculus]<br>4: gi 112180378 Far upstream element (FUSE) binding protein 1 [Mus musculus]                                                                                                                                                                                                                                                                                                                                                             | 68668.08                 | 317           | 19              | ICGDAGTSLNSNDYGYGCGK  | 84               | 658.63336      | 1972.876252     | 1972.876175        | 1                | 2 Oxidation (M) |
|         |                                                                                                                                                                                                                                                                                                                                                                                                                                                                                                                                                                                                                                                                          |                          |               |                 | SVQAGNPGGPGGGR        | 81               | 654.32676      | 1306.638968     | 1306.637726        | 0.9              |                 |
|         |                                                                                                                                                                                                                                                                                                                                                                                                                                                                                                                                                                                                                                                                          |                          |               |                 | IGGDAAGTSLNSNDYGYGCGK | 76               | 987.44252      | 1972.870488     | 1972.876175        | 2.8              |                 |
|         |                                                                                                                                                                                                                                                                                                                                                                                                                                                                                                                                                                                                                                                                          |                          |               |                 | IAQTGPPDR             | 75               | 534.29547      | 1066.576398     | 1066.577087        | 0.6              |                 |
|         |                                                                                                                                                                                                                                                                                                                                                                                                                                                                                                                                                                                                                                                                          |                          |               |                 | RPLEDGDQDPAK          | 70               | 670.82509      | 1339.635628     | 1339.63678         | 0.8              |                 |
|         |                                                                                                                                                                                                                                                                                                                                                                                                                                                                                                                                                                                                                                                                          |                          |               |                 | MVMIQDGPQNTGADKPLR    | 67               | 868.32784      | 2001.961092     | 2001.961151        | 0                |                 |
|         |                                                                                                                                                                                                                                                                                                                                                                                                                                                                                                                                                                                                                                                                          |                          |               |                 | IGGNEGIDVPIPR         | 61               | 668.86449      | 1335.714428     | 1335.7146          | 0.1              |                 |
|         |                                                                                                                                                                                                                                                                                                                                                                                                                                                                                                                                                                                                                                                                          |                          |               |                 | LLDQIVEK              | 58               | 479.2845       | 956.554448      | 956.554214         | 0.2              |                 |
|         |                                                                                                                                                                                                                                                                                                                                                                                                                                                                                                                                                                                                                                                                          |                          |               |                 | RPLEDGDQDPAK          | 57               | 447.55273      | 1339.636362     | 1339.63678         | 0.3              |                 |
|         |                                                                                                                                                                                                                                                                                                                                                                                                                                                                                                                                                                                                                                                                          |                          |               |                 | IQNDAGVVR             | 55               | 436.73302      | 871.451488      | 871.451141         | 0.3              |                 |
|         |                                                                                                                                                                                                                                                                                                                                                                                                                                                                                                                                                                                                                                                                          |                          |               |                 | RLLDQIVEK             | 50               | 557.33525      | 1112.655948     | 1112.655319        | 0.5              |                 |
|         |                                                                                                                                                                                                                                                                                                                                                                                                                                                                                                                                                                                                                                                                          |                          |               |                 | SPPNADPNMK            | 46               | 592.27416      | 1182.533768     | 1182.533905        | 0.1              |                 |
|         |                                                                                                                                                                                                                                                                                                                                                                                                                                                                                                                                                                                                                                                                          |                          |               |                 | SPPNADPNMK            | 41               | 592.27544      | 1182.536328     | 1182.533905        | 2                |                 |
|         |                                                                                                                                                                                                                                                                                                                                                                                                                                                                                                                                                                                                                                                                          |                          |               |                 | QLIEEK                | 41               | 759.42438      | 758.417104      | 758.417389         | 0.3              |                 |
|         |                                                                                                                                                                                                                                                                                                                                                                                                                                                                                                                                                                                                                                                                          |                          |               |                 | EMVLELIR              | 39               | 509.78369      | 1017.552828     | 1017.552826        | 0                |                 |
|         |                                                                                                                                                                                                                                                                                                                                                                                                                                                                                                                                                                                                                                                                          |                          |               |                 | SVMTEEYK              | 37               | 501.726        | 1001.437448     | 1001.437531        | 0                |                 |
|         |                                                                                                                                                                                                                                                                                                                                                                                                                                                                                                                                                                                                                                                                          |                          |               |                 | ITGDPYK               | 36               | 793.40906      | 792.401784      | 792.401749         | 0                |                 |
|         |                                                                                                                                                                                                                                                                                                                                                                                                                                                                                                                                                                                                                                                                          |                          |               |                 | GTQQIDYAR             | 34               | 574.79065      | 1147.566748     | 1147.562164        | 3.9              |                 |
| AWEEYYK | 33                                                                                                                                                                                                                                                                                                                                                                                                                                                                                                                                                                                                                                                                       | 494.72437                | 987.434188    | 987.433762      | 0.4                   |                  |                |                 |                    |                  |                 |
| 4       | 1: gi 4378711 nucleic acid binding factor pRM10 [Rattus norvegicus]<br>2: gi 5562845 heterogeneous nuclear ribonucleoprotein; type A/B hnRNP p40 [Rattus norvegicus]<br>3: gi 6754222 heterogeneous nuclear ribonucleoprotein A/B [Mus musculus]<br>4: gi 6911221 CArG-binding factor A [Rattus norvegicus]<br>5: gi 12851175 unnamed protein product [Mus musculus]<br>6: gi 13786156 heterogeneous nuclear ribonucleoprotein A/B [Rattus norvegicus]<br>7: gi 26345118 unnamed protein product [Mus musculus]<br>8: gi 27695334 Hnrpab protein [Mus musculus]<br>9: gi 74225210 unnamed protein product [Mus musculus]<br>10: gi 89275690 S1 protein C2 [Mus musculus] | 34250.09                 | 133           | 5               | FVGGNLPTEATEEK        | 97               | 752.38812      | 1502.761688     | 1502.761597        | 0                | Oxidation (M)   |
|         |                                                                                                                                                                                                                                                                                                                                                                                                                                                                                                                                                                                                                                                                          |                          |               |                 | EYVQQQQYSSGGR         | 71               | 750.34937      | 1498.684188     | 1498.680008        | 2.7              |                 |
|         |                                                                                                                                                                                                                                                                                                                                                                                                                                                                                                                                                                                                                                                                          |                          |               |                 | MFYGGLSWDTSKK         | 57               | 736.36707      | 1470.719588     | 1470.717651        | 1.3              |                 |
|         |                                                                                                                                                                                                                                                                                                                                                                                                                                                                                                                                                                                                                                                                          |                          |               |                 | MFVGGLSWDTSKK         | 40               | 491.24666      | 1470.718152     | 1470.717651        | 0.3              |                 |
|         |                                                                                                                                                                                                                                                                                                                                                                                                                                                                                                                                                                                                                                                                          |                          |               |                 | DLKDYFTK              | 40               | 515.2667       | 1028.518848     | 1028.517838        | 0.9              |                 |
